# Supplementary material for: Producing realistic climate data with GANs
Source: Copernicus journal article supplement (doi:10.5194/npg-2021-6), 2021-02-16
Supplement: Supplementary file [file npg-2021-6-AC2-supplement.pdf]

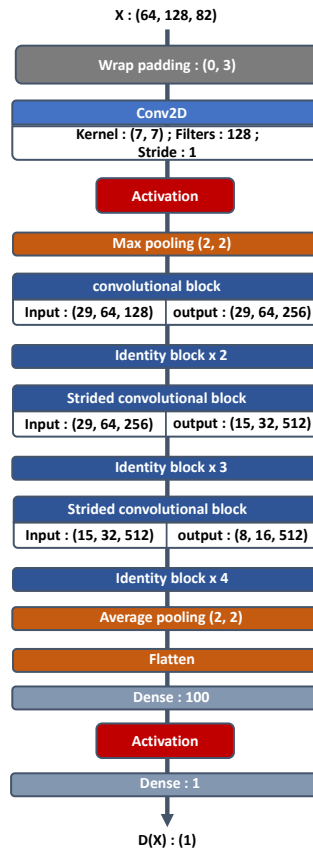

Figure 1 - Critic architecture

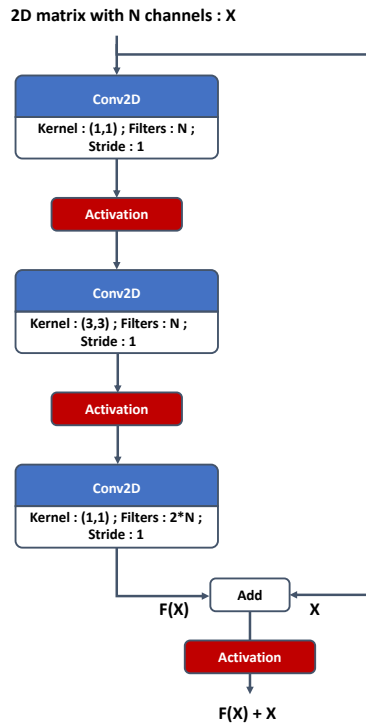

Figure 2 Residual identity block for the critic

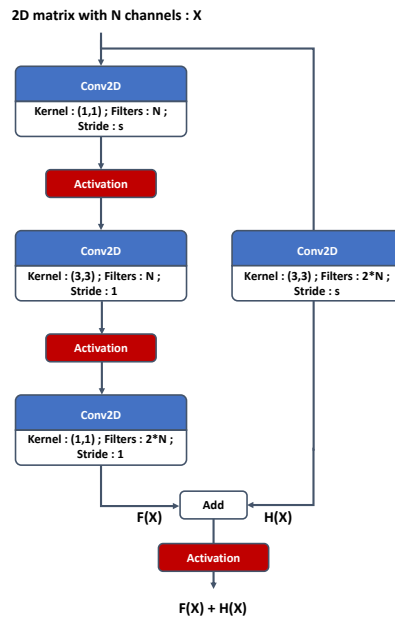

Figure 3 Residual convolutional block for the critic. If  $s$  is different from 1 it is referenced as strided convolutional block in Fig. 1

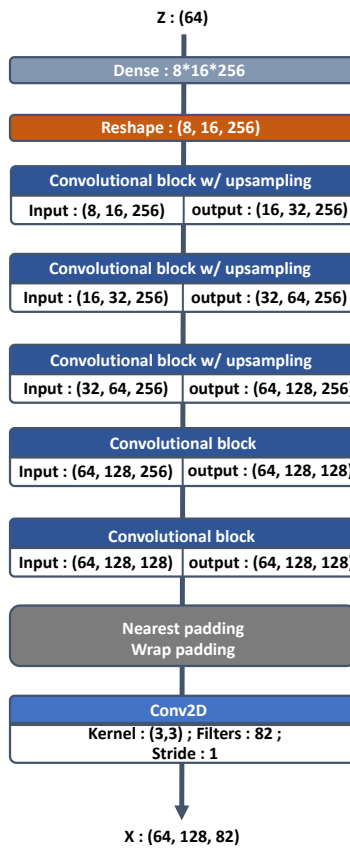

Figure 4 Generator Architecture

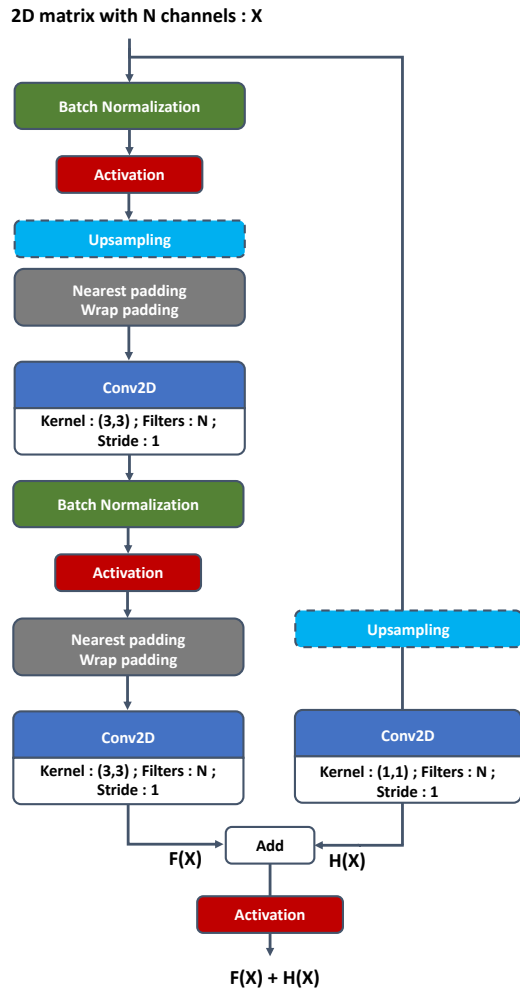

Figure 5 Residual convolutional block for the generator. The upsampling layer can be removed if not necessary and is mentioned when used in Fig. 4

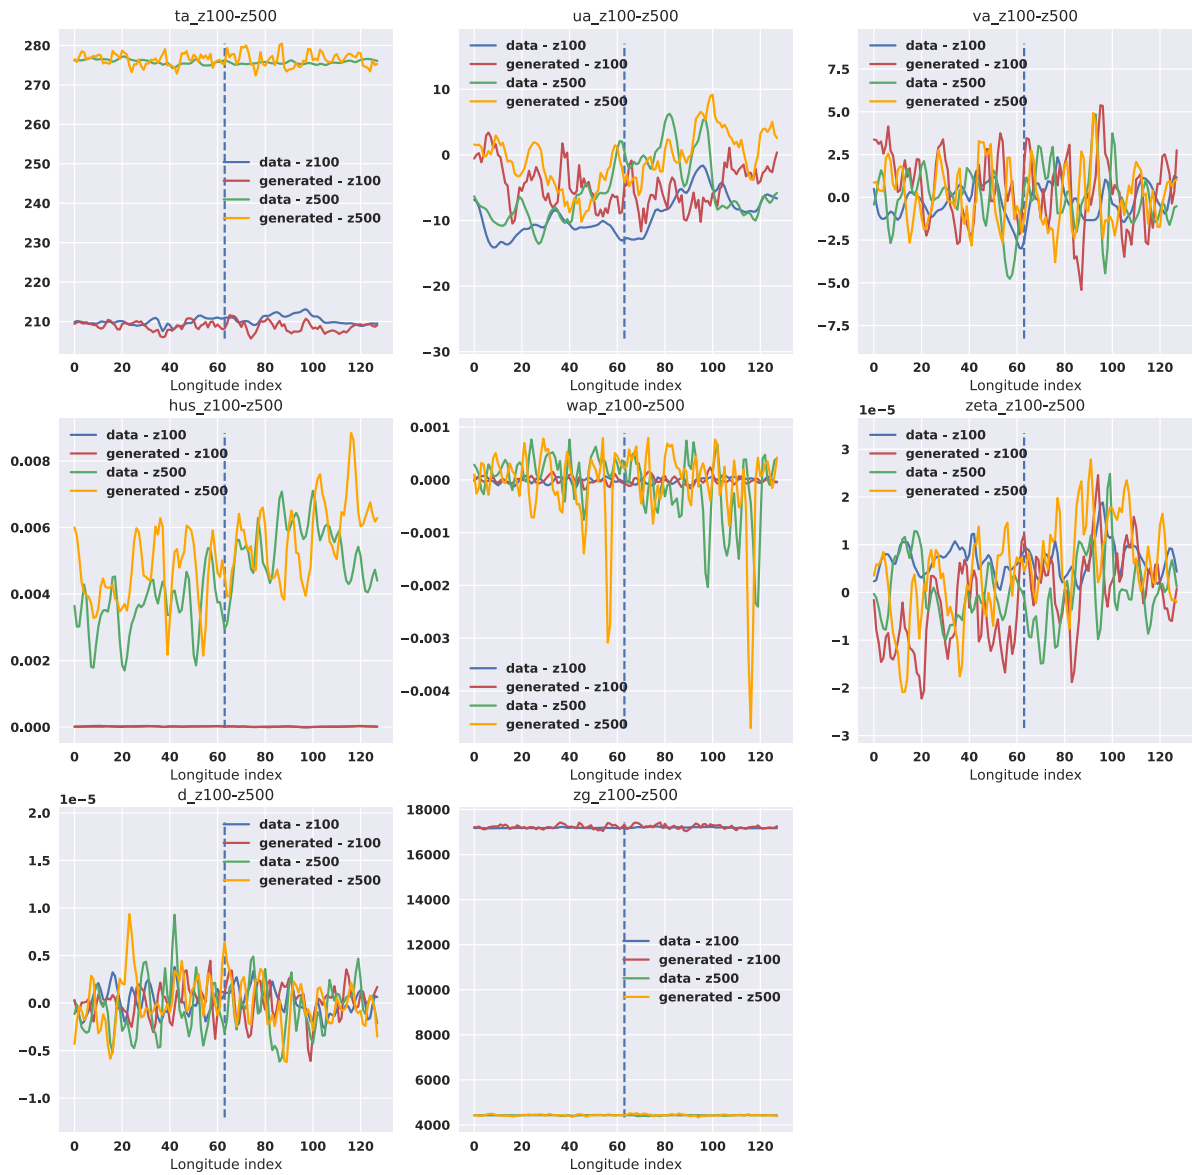

Figure 6 Variables of 1 sample from the dataset and 1 from the generator along the longitude for 2 levels z100 and z500. The dashed line represents the domain boundary where the periodic boundary condition should be enforced.
